# Supplementary material for: Measuring the Development of Therapeutic-Decision-Making Skills by Practicing Pharmacists Undertaking a University-Based Postgraduate Clinical Qualification at Distance
Source: MDPI journal article supplement (doi:10.3390/pharmacy8020083), 2020-05-11
Supplement: s1 [file s1]

**Table 1.** Raw scores by vignette types (A, B) and timing (pre-intervention, post-intervention) for participants (n = 28).

| ID number                  | Pre-intervention vignette | Pre-intervention score | Post-intervention vignette | Post-intervention score | Difference between scores |
|----------------------------|---------------------------|------------------------|----------------------------|-------------------------|---------------------------|
| 1                          | A                         | 3                      | B                          | 4                       | 1                         |
| 2                          | A                         | 2                      | B                          | 2                       | 0                         |
| 3                          | B                         | 3                      | A                          | 4                       | 1                         |
| 4                          | A                         | 2                      | B                          | 2                       | 0                         |
| 5                          | B                         | 2                      | A                          | 2                       | 0                         |
| 6                          | A                         | 2                      | B                          | 3                       | 1                         |
| 7                          | A                         | 2                      | B                          | 4                       | 2                         |
| 8                          | B                         | 2                      | A                          | 4                       | 2                         |
| 9                          | A                         | 3                      | B                          | 4                       | 1                         |
| 10                         | A                         | 3                      | B                          | 2                       | -1                        |
| 11                         | B                         | 3                      | A                          | 2                       | -1                        |
| 12                         | B                         | 2                      | A                          | 4                       | 2                         |
| 13                         | B                         | 2                      | A                          | 5                       | 3                         |
| 14                         | B                         | 2                      | A                          | 4                       | 2                         |
| 16                         | B                         | 1                      | A                          | 2                       | 1                         |
| 17                         | A                         | 2                      | B                          | 3                       | 1                         |
| 18                         | B                         | 3                      | A                          | 5                       | 2                         |
| 19                         | B                         | 2                      | A                          | 2                       | 0                         |
| 20                         | A                         | 3                      | B                          | 5                       | 2                         |
| 21                         | B                         | 3                      | A                          | 5                       | 2                         |
| 22                         | A                         | 2                      | B                          | 4                       | 2                         |
| 23                         | A                         | 2                      | B                          | 4                       | 2                         |
| 24                         | B                         | 2                      | A                          | 3                       | 1                         |
| 26                         | A                         | 3                      | B                          | 5                       | 2                         |
| 27                         | B                         | 2                      | A                          | 4                       | 2                         |
| 28                         | A                         | 3                      | B                          | 3                       | 0                         |
| 30                         | A                         | 5                      | B                          | 4                       | -1                        |
| 31                         | A                         | 2                      | B                          | 4                       | 2                         |
| <b>Median</b>              |                           | 2                      |                            | 4                       | 2                         |
| <b>Range</b>               |                           | 1-4                    |                            | 2-5                     | -1, 3                     |
| <b>Interquartile range</b> |                           | 2-3                    |                            | 2.25-5                  | 0-2                       |

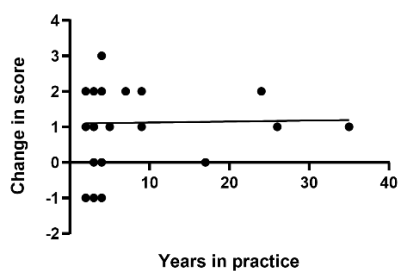

(a)

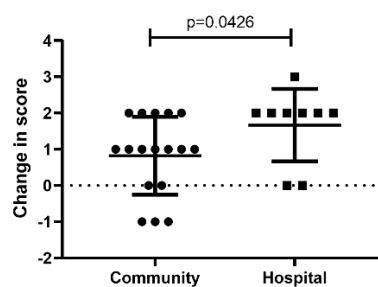

(b)

**Figure S1.** (a) Change in score pre- and post-intervention and years of pharmacy practice. The solid black line is the regression line. The years in practice was not found to predict the change in score ( $R^2=0.026$ ,  $p=0.92$ ). (b) Change in score pre- and post-intervention compared by practice site. Pharmacists practicing in a hospital setting had a larger median increase in score (2 units [range 0-3]) in the post-intervention scores compared to community pharmacists (1 unit [range -1-3],  $p=0.0426$ ).
